# Supplementary material for: Luminescent hybrid halides with various centering metal cations (Zn, Cd and Pb) and diverse structures
Source: Royal Society of Chemistry journal article supplement (doi:10.1039/d2dt04067k), 2023-01-01
Supplement: d2dt04067k1.pdf [file d2dt04067k1.pdf]

## Supporting Information

### **Luminescent Hybrid Halides with Various Centering Metal Cations (Zn, Cd and Pb) and Diverse Structures**

Liubing Fan,<sup>a</sup> Shiqiang Hao,<sup>b</sup> Shihui He,<sup>a</sup> Xusheng Zhang,<sup>a</sup> Mingyang Li,<sup>a</sup>  
Christopher Wolverton,<sup>b</sup> Jing Zhao <sup>\*a</sup> and Quanlin Liu <sup>a</sup>

<sup>a</sup>The Beijing Municipal Key Laboratory of New Energy Materials and Technologies,  
School of Materials Sciences and Engineering, University of Science and Technology  
Beijing, Beijing 100083, China

<sup>b</sup>Department of Materials Science and Engineering, Northwestern University,  
Evanston, Illinois 60208, United States

#### **Corresponding Author**

\*jingzhao@ustb.edu.cn

## Contents

|                                                                                                                                                                                                                                                         |            |
|---------------------------------------------------------------------------------------------------------------------------------------------------------------------------------------------------------------------------------------------------------|------------|
| <b>Table S1.</b> Atomic coordinates ( $\times 10^4$ ) and equivalent isotropic displacement parameters ( $\text{\AA}^2 \times 10^3$ ) for $(\text{Bmpip})_2\text{ZnBr}_4$ at 293(2) K with estimated standard deviations in parentheses.                | <b>S3</b>  |
| <b>Table S2.</b> Anisotropic displacement parameters ( $\text{\AA}^2 \times 10^3$ ) for $(\text{Bmpip})_2\text{ZnBr}_4$ at 293(2) K with estimated standard deviations in parentheses.                                                                  | <b>S3</b>  |
| <b>Table S3.</b> Bond lengths [ $\text{\AA}$ ] and Bond angles [ $^\circ$ ] for $(\text{Bmpip})_2\text{ZnBr}_4$ at 293(2) K with estimated standard deviations in parentheses.                                                                          | <b>S3</b>  |
| <b>Table S4.</b> Atomic coordinates ( $\times 10^4$ ) and equivalent isotropic displacement parameters ( $\text{\AA}^2 \times 10^3$ ) for $(\text{Bmpip})_2\text{CdBr}_4$ at 293(2) K with estimated standard deviations in parentheses.                | <b>S4</b>  |
| <b>Table S5.</b> Anisotropic displacement parameters ( $\text{\AA}^2 \times 10^3$ ) for $(\text{Bmpip})_2\text{CdBr}_4$ at 293(2) K with estimated standard deviations in parentheses.                                                                  | <b>S4</b>  |
| <b>Table S6.</b> Bond lengths [ $\text{\AA}$ ] for $(\text{Bmpip})_2\text{CdBr}_4$ at 293(2) K with estimated standard deviations in parentheses.                                                                                                       | <b>S5</b>  |
| <b>Table S7.</b> Bond angles [ $^\circ$ ] for $(\text{Bmpip})_2\text{CdBr}_4$ at 293(2) K with estimated standard deviations in parentheses.                                                                                                            | <b>S5</b>  |
| <b>Table S8.</b> Atomic coordinates ( $\times 10^4$ ) and equivalent isotropic displacement parameters ( $\text{\AA}^2 \times 10^3$ ) for $(\text{Bmpip})_8\text{Pb}_{11}\text{Br}_{30}$ at 293(2) K with estimated standard deviations in parentheses. | <b>S6</b>  |
| <b>Table S9.</b> Anisotropic displacement parameters ( $\text{\AA}^2 \times 10^3$ ) for $(\text{Bmpip})_8\text{Pb}_{11}\text{Br}_{30}$ at 293(2) K with estimated standard deviations in parentheses.                                                   | <b>S7</b>  |
| <b>Table S10.</b> Bond lengths [ $\text{\AA}$ ] for $(\text{Bmpip})_8\text{Pb}_{11}\text{Br}_{30}$ at 293(2) K with estimated standard deviations in parentheses.                                                                                       | <b>S8</b>  |
| <b>Table S11.</b> Bond angles [ $^\circ$ ] for $(\text{Bmpip})_8\text{Pb}_{11}\text{Br}_{30}$ at 293(2) K with estimated standard deviations in parentheses.                                                                                            | <b>S9</b>  |
| <b>Table S12.</b> Bond length and bond angle average and distortion of individual $[\text{PbBr}_6]$ octahedra of $(\text{Bmpip})_8\text{Pb}_{11}\text{Br}_{30}$ ( $\theta_m$ is the mean value of Br-Pb-Br angles).                                     | <b>S10</b> |
| <b>Table S13.</b> Main parameters of crystal and refinement power of $(\text{Bmpip})_2\text{ZnBr}_4$ .                                                                                                                                                  | <b>S10</b> |
| <b>Fig. S1</b> Optical and SEM images and EDS mapping diagrams of $(\text{Bmpip})_2\text{ZnBr}_4$ (a), $(\text{Bmpip})_2\text{CdBr}_4$ (b) and $(\text{Bmpip})_8\text{Pb}_{11}\text{Br}_{30}$ (c).                                                      | <b>S11</b> |
| <b>Fig. S2</b> (a) Local details of simulated and experimental PXRD patterns. (b) Rietveld refinement of $(\text{Bmpip})_2\text{ZnBr}_4$ .                                                                                                              | <b>S11</b> |
| <b>Fig. S3</b> Absorption spectra and the band gap obtained from Tauc plots (inset) of $(\text{Bmpip})_2\text{ZnBr}_4$ .                                                                                                                                | <b>S12</b> |
| <b>Fig. S4</b> Absorption spectra and the band gap obtained from Tauc plots (inset) of $(\text{Bmpip})_2\text{CdBr}_4$ .                                                                                                                                | <b>S12</b> |
| <b>Fig. S5</b> Absorption spectra and the band gap obtained from Tauc plots (inset) of $(\text{Bmpip})_8\text{Pb}_{11}\text{Br}_{30}$ .                                                                                                                 | <b>S13</b> |
| <b>Fig. S6</b> CIE coordinates change with temperature increasing of $(\text{Bmpip})_2\text{ZnBr}_4$ .                                                                                                                                                  | <b>S13</b> |
| <b>Fig. S7</b> CIE coordinates change with temperature increasing of $(\text{Bmpip})_2\text{CdBr}_4$ .                                                                                                                                                  | <b>S14</b> |
| <b>Fig. S8</b> CIE coordinates change with temperature increasing of $(\text{Bmpip})_8\text{Pb}_{11}\text{Br}_{30}$ .                                                                                                                                   | <b>S14</b> |

**Table S1.** Atomic coordinates ( $\times 10^4$ ) and equivalent isotropic displacement parameters ( $\text{\AA}^2 \times 10^3$ ) for  $(\text{Bmpip})_2\text{ZnBr}_4$  at 293(2) K with estimated standard deviations in parentheses.

| Label | $x$     | $y$      | $z$     | Occupancy | $U_{\text{eq}}^*$ |
|-------|---------|----------|---------|-----------|-------------------|
| Br(1) | 6169(1) | 9624(1)  | 1527(1) | 1         | 37(1)             |
| Br(2) | 7332(1) | 12902(1) | 2153(1) | 1         | 38(1)             |
| Br(3) | 8528(1) | 10173(1) | 1489(1) | 1         | 36(1)             |
| Br(4) | 8207(1) | 9927(1)  | 3699(1) | 1         | 39(1)             |
| Zn(1) | 7560(1) | 10626(1) | 2257(1) | 1         | 30(1)             |

\* $U_{\text{eq}}$  is defined as one third of the trace of the orthogonalized  $U_{ij}$  tensor.

**Table S2.** Anisotropic displacement parameters ( $\text{\AA}^2 \times 10^3$ ) for  $(\text{Bmpip})_2\text{ZnBr}_4$  at 293(2) K with estimated standard deviations in parentheses.

| Label | $U_{11}$ | $U_{22}$ | $U_{33}$ | $U_{12}$ | $U_{13}$ | $U_{23}$ |
|-------|----------|----------|----------|----------|----------|----------|
| Br(1) | 30(1)    | 38(1)    | 42(1)    | -6(1)    | 12(1)    | -2(1)    |
| Br(2) | 45(1)    | 29(1)    | 43(1)    | -3(1)    | 20(1)    | 0(1)     |
| Br(3) | 30(1)    | 42(1)    | 36(1)    | 1(1)     | 14(1)    | 0(1)     |
| Br(4) | 43(1)    | 42(1)    | 31(1)    | 3(1)     | 12(1)    | 4(1)     |
| Zn(1) | 29(1)    | 30(1)    | 31(1)    | -2(1)    | 11(1)    | 0(1)     |

The anisotropic displacement factor exponent takes the form:  $-2\pi^2[h^2a^{*2}U_{11} + \dots + 2hka^*b^*U_{12}]$ .

**Table S3.** Bond lengths [ $\text{\AA}$ ] and Bond angles [ $^\circ$ ] for  $(\text{Bmpip})_2\text{ZnBr}_4$  at 293(2) K with estimated standard deviations in parentheses.

| Label       | Distances | Label             | Angles      |
|-------------|-----------|-------------------|-------------|
| Br(1)-Zn(1) | 2.4029(3) | Br(1)-Zn(1)-Br(2) | 107.742(13) |
| Br(2)-Zn(1) | 2.4199(3) | Br(1)-Zn(1)-Br(3) | 108.451(13) |
| Br(3)-Zn(1) | 2.4269(3) | Br(2)-Zn(1)-Br(3) | 105.569(12) |
| Br(4)-Zn(1) | 2.3991(3) | Br(4)-Zn(1)-Br(1) | 112.141(13) |
|             |           | Br(4)-Zn(1)-Br(2) | 112.135(13) |
|             |           | Br(4)-Zn(1)-Br(3) | 110.513(13) |

Symmetry transformations used to generate equivalent atoms:

(1)  $-x, y + 1/2, -z + 1/2$  (2)  $-x, -y, -z$  (3)  $x, -y + 1/2, z + 1/2$ .

**Table S4.** Atomic coordinates ( $\times 10^4$ ) and equivalent isotropic displacement parameters ( $\text{\AA}^2 \times 10^3$ ) for  $(\text{Bmpip})_2\text{CdBr}_4$  at 293(2) K with estimated standard deviations in parentheses.

| Label  | $x$      | $y$       | $z$     | Occupancy | $U_{\text{eq}}^*$ |
|--------|----------|-----------|---------|-----------|-------------------|
| Cd(1)  | 3877(1)  | -392(1)   | 1240(1) | 1         | 55(1)             |
| Cd     | 8854(1)  | -5101(1)  | 1244(1) | 1         | 64(1)             |
| Br(1)  | 9297(1)  | -6791(2)  | 748(1)  | 1         | 73(1)             |
| Br(4)  | 3907(5)  | 1060(6)   | 601(2)  | 0.522(2)  | 54(2)             |
| Br(6B) | 2879(4)  | 588(13)   | 1634(3) | 0.64(7)   | 83(3)             |
| Br(5)  | 5269(4)  | -714(6)   | 1739(2) | 0.522(2)  | 89(2)             |
| Br(7B) | 3222(15) | -2320(20) | 901(7)  | 0.193(14) | 201(9)            |
| Br(B)  | 7743(2)  | -6206(4)  | 1536(1) | 0.851(8)  | 122(2)            |
| Br(2)  | 9965(3)  | -5099(4)  | 1907(2) | 0.522(2)  | 100(2)            |
| Br(3)  | 8684(3)  | -2685(3)  | 919(2)  | 0.522(2)  | 100(2)            |
| Br(A)  | 7428(7)  | -5358(17) | 1289(4) | 0.149(8)  | 107(5)            |
| Br(6A) | 2908(11) | 780(30)   | 1589(6) | 0.36(7)   | 126(8)            |
| Br(7A) | 3556(3)  | -2855(3)  | 1012(1) | 0.807(14) | 100(2)            |
| Br(9)  | 9994(3)  | -4395(4)  | 1848(2) | 0.522(2)  | 97(2)             |
| Br(10) | 8314(4)  | -3106(6)  | 800(2)  | 0.522(2)  | 154(2)            |
| Br(11) | 4072(6)  | 1204(10)  | 655(3)  | 0.478(2)  | 91(3)             |
| Br(13) | 5201(4)  | -206(5)   | 1749(2) | 0.478(2)  | 67(2)             |

\* $U_{\text{eq}}$  is defined as one third of the trace of the orthogonalized  $U_{ij}$  tensor.

**Table S5.** Anisotropic displacement parameters ( $\text{\AA}^2 \times 10^3$ ) for  $(\text{Bmpip})_2\text{CdBr}_4$  at 293(2) K with estimated standard deviations in parentheses.

| Label  | $U_{11}$ | $U_{22}$ | $U_{33}$ | $U_{12}$ | $U_{13}$ | $U_{23}$ |
|--------|----------|----------|----------|----------|----------|----------|
| Cd(1)  | 55(1)    | 64(1)    | 46(1)    | -12(1)   | 13(1)    | 2(1)     |
| Cd     | 55(1)    | 90(1)    | 52(1)    | -3(1)    | 20(1)    | -13(1)   |
| Br(1)  | 81(1)    | 77(1)    | 70(1)    | -17(1)   | 38(1)    | -18(1)   |
| Br(4)  | 67(3)    | 60(2)    | 37(2)    | -14(2)   | 16(2)    | -2(2)    |
| Br(6B) | 69(3)    | 123(4)   | 69(3)    | -1(3)    | 42(2)    | 9(3)     |
| Br(5)  | 72(2)    | 143(5)   | 53(2)    | 35(3)    | 14(2)    | 7(3)     |
| Br(7B) | 178(14)  | 77(9)    | 280(20)  | -57(9)   | -96(16)  | 27(10)   |
| Br(B)  | 103(2)   | 173(3)   | 115(2)   | -54(2)   | 78(2)    | -61(2)   |
| Br(2)  | 119(3)   | 118(3)   | 51(2)    | 0(3)     | -4(2)    | 17(2)    |
| Br(3)  | 132(3)   | 67(2)    | 79(2)    | 27(2)    | -25(2)   | -11(2)   |
| Br(9)  | 100(2)   | 125(3)   | 64(2)    | -43(3)   | 17(2)    | -26(2)   |
| Br(10) | 205(6)   | 146(4)   | 103(3)   | 93(4)    | 20(3)    | -24(3)   |
| Br(11) | 62(3)    | 132(6)   | 85(4)    | 4(3)     | 29(3)    | 51(4)    |
| Br(13) | 55(2)    | 77(3)    | 60(2)    | 5(2)     | -5(2)    | -8(2)    |
| Br(A)  | 92(8)    | 167(12)  | 76(7)    | 6(7)     | 44(6)    | 13(7)    |
| Br(6A) | 132(12)  | 175(11)  | 92(6)    | 64(11)   | 69(7)    | 74(11)   |
| Br(7A) | 128(2)   | 53(2)    | 108(2)   | -25(2)   | 0(2)     | 5(1)     |

The anisotropic displacement factor exponent takes the form:  $-2\pi^2[h^2a^{*2}U_{11} + \dots + 2hka^*b^*U_{12}]$ .

**Table S6.** Bond lengths [Å] for (Bmpip)<sub>2</sub>CdBr<sub>4</sub> at 293(2) K with estimated standard deviations in parentheses.

| Label        | Distances | Label     | Distances  |
|--------------|-----------|-----------|------------|
| Cd(1)-Br(4)  | 2.574(7)  | Cd-Br(1)  | 2.5870(13) |
| Cd(1)-Br(6B) | 2.594(7)  | Cd-Br(B)  | 2.603(2)   |
| Cd(1)-Br(5)  | 2.647(7)  | Cd-Br(2)  | 2.593(4)   |
| Cd(1)-Br(7B) | 2.384(12) | Cd-Br(3)  | 2.619(4)   |
| Cd(1)-Br(11) | 2.587(10) | Cd-Br(9)  | 2.591(4)   |
| Cd(1)-Br(13) | 2.555(6)  | Cd-Br(10) | 2.524(5)   |
| Cd(1)-Br(6A) | 2.539(18) | Cd-Br(A)  | 2.551(12)  |
| Cd(1)-Br(7A) | 2.585(2)  |           |            |

Symmetry transformations used to generate equivalent atoms:

(1)  $-x, y + 1/2, -z + 1/2$  (2)  $-x, -y, -z$  (3)  $x, -y + 1/2, z + 1/2$ .

**Table S7.** Bond angles [°] for (Bmpip)<sub>2</sub>CdBr<sub>4</sub> at 293(2) K with estimated standard deviations in parentheses.

| Label               | Angles     | Label           | Angles     |
|---------------------|------------|-----------------|------------|
| Br(4)-Cd(1)-Br(5)   | 113.5(2)   | Br(1)-Cd-Br(B)  | 108.52(6)  |
| Br(4)-Cd(1)-Br(7A)  | 109.40(13) | Br(1)-Cd-Br(2)  | 105.36(13) |
| Br(7B)-Cd(1)-Br(6B) | 103.3(7)   | Br(1)-Cd-Br(3)  | 110.84(11) |
| Br(7B)-Cd(1)-Br(11) | 105.6(6)   | Br(1)-Cd-Br(9)  | 112.24(12) |
| Br(7B)-Cd(1)-Br(13) | 129.9(8)   | Br(2)-Cd-Br(3)  | 110.08(12) |
| Br(11)-Cd(1)-Br(6B) | 111.3(4)   | Br(9)-Cd-Br(B)  | 109.83(12) |
| Br(13)-Cd(1)-Br(6B) | 104.8(2)   | Br(10)-Cd-Br(1) | 105.35(11) |
| Br(13)-Cd(1)-Br(11) | 101.5(3)   | Br(10)-Cd-Br(B) | 109.5(2)   |
| Br(6A)-Cd(1)-Br(4)  | 104.8(6)   | Br(10)-Cd-Br(9) | 111.32(19) |
| Br(6A)-Cd(1)-Br(5)  | 112.8(4)   | Br(A)-Cd-Br(1)  | 114.1(3)   |
| Br(6A)-Cd(1)-Br(7A) | 116.2(6)   | Br(A)-Cd-Br(2)  | 120.8(3)   |
| Br(7A)-Cd(1)-Br(5)  | 100.34(17) | Br(A)-Cd-Br(3)  | 95.3(4)    |

Symmetry transformations used to generate equivalent atoms:

(1)  $-x, y + 1/2, -z + 1/2$  (2)  $-x, -y, -z$  (3)  $x, -y + 1/2, z + 1/2$ .

**Table S8.** Atomic coordinates ( $\times 10^4$ ) and equivalent isotropic displacement parameters ( $\text{\AA}^2 \times 10^3$ ) for  $(\text{Bmpip})_8\text{Pb}_{11}\text{Br}_{30}$  at 293(2) K with estimated standard deviations in parentheses.

| Label  | $x$       | $y$      | $z$      | Occupancy | $U_{\text{eq}}^*$ |
|--------|-----------|----------|----------|-----------|-------------------|
| Br     | 12325(11) | 4231(19) | 5004(3)  | 0.55(5)   | 47(3)             |
| Br(2)  | 12516(10) | 4565(14) | 4974(4)  | 0.45(5)   | 34(2)             |
| Br(3)  | 10626(2)  | 6427(1)  | 3610(1)  | 1         | 51(1)             |
| Br(4)  | 9520(2)   | 4138(1)  | 3873(1)  | 1         | 44(1)             |
| Br(5)  | 9860(1)   | 5994(1)  | 1767(1)  | 1         | 37(1)             |
| Br(6)  | 6707(1)   | 5225(1)  | 2713(1)  | 1         | 44(1)             |
| Br(7)  | 7713(2)   | 7626(1)  | 2606(1)  | 1         | 44(1)             |
| Br(8)  | 7045(1)   | 6278(1)  | 125(1)   | 1         | 40(1)             |
| Br(9)  | 8069(1)   | 8458(1)  | 325(1)   | 1         | 36(1)             |
| Br(10) | 7396(1)   | 8323(1)  | -1705(1) | 1         | 38(1)             |
| Br(11) | 4311(1)   | 7252(1)  | -801(1)  | 1         | 37(1)             |
| Br(12) | 5116(1)   | 7515(1)  | 1586(1)  | 1         | 39(1)             |
| Br(13) | 7567(1)   | 10481(1) | 1865(1)  | 1         | 42(1)             |
| Br(14) | 5365(1)   | 10371(1) | 715(1)   | 1         | 32(1)             |
| Br(15) | 4452(2)   | 9368(1)  | 2849(1)  | 1         | 48(1)             |
| Br(16) | 5676(2)   | 11954(1) | 3107(1)  | 1         | 56(1)             |
| Pb(1)  | 10000     | 5000     | 5000     | 1         | 28(1)             |
| Pb(2)  | 8628(1)   | 5817(1)  | 3318(1)  | 1         | 29(1)             |
| Pb(3)  | 7492(1)   | 6716(1)  | 1501(1)  | 1         | 27(1)             |
| Pb(4)  | 6051(1)   | 7921(1)  | -228(1)  | 1         | 26(1)             |
| Pb(5)  | 6345(1)   | 9048(1)  | 1691(1)  | 1         | 30(1)             |
| Pb(6)  | 5234(1)   | 11205(1) | 2059(1)  | 1         | 30(1)             |

\* $U_{\text{eq}}$  is defined as one third of the trace of the orthogonalized  $U_{ij}$  tensor

**Table S9.** Anisotropic displacement parameters ( $\text{\AA}^2 \times 10^3$ ) for  $(\text{Bmpip})_8\text{Pb}_{11}\text{Br}_{30}$  at 293(2) K with estimated standard deviations in parentheses.

| Label  | $U_{11}$ | $U_{22}$ | $U_{33}$ | $U_{12}$ | $U_{13}$ | $U_{23}$ |
|--------|----------|----------|----------|----------|----------|----------|
| Br     | 33(2)    | 66(8)    | 37(2)    | 15(4)    | -5(2)    | -15(2)   |
| Br(2)  | 32(2)    | 40(5)    | 31(2)    | 4(3)     | -4(2)    | -15(2)   |
| Br(3)  | 65(1)    | 43(1)    | 47(1)    | -22(1)   | -23(1)   | 0(1)     |
| Br(4)  | 58(1)    | 28(1)    | 48(1)    | 2(1)     | -14(1)   | -10(1)   |
| Br(5)  | 32(1)    | 49(1)    | 28(1)    | -2(1)    | -2(1)    | -10(1)   |
| Br(6)  | 35(1)    | 40(1)    | 50(1)    | -11(1)   | -12(1)   | 3(1)     |
| Br(7)  | 60(1)    | 38(1)    | 48(1)    | 16(1)    | -32(1)   | -19(1)   |
| Br(8)  | 53(1)    | 28(1)    | 48(1)    | 10(1)    | -27(1)   | -13(1)   |
| Br(9)  | 31(1)    | 34(1)    | 40(1)    | -6(1)    | -6(1)    | -6(1)    |
| Br(10) | 35(1)    | 44(1)    | 30(1)    | 4(1)     | -2(1)    | -10(1)   |
| Br(11) | 35(1)    | 31(1)    | 44(1)    | -6(1)    | -12(1)   | -6(1)    |
| Br(12) | 31(1)    | 54(1)    | 29(1)    | -8(1)    | -6(1)    | -4(1)    |
| Br(13) | 34(1)    | 50(1)    | 51(1)    | 2(1)     | -17(1)   | -20(1)   |
| Br(14) | 36(1)    | 33(1)    | 29(1)    | 5(1)     | -14(1)   | -10(1)   |
| Br(15) | 57(1)    | 38(1)    | 35(1)    | 0(1)     | 1(1)     | 2(1)     |
| Br(16) | 61(1)    | 73(1)    | 45(1)    | 0(1)     | -13(1)   | -36(1)   |
| Pb(1)  | 29(1)    | 33(1)    | 23(1)    | 4(1)     | -10(1)   | -5(1)    |
| Pb(2)  | 30(1)    | 33(1)    | 23(1)    | 4(1)     | -10(1)   | -5(1)    |
| Pb(3)  | 31(1)    | 25(1)    | 26(1)    | 2(1)     | -12(1)   | -5(1)    |
| Pb(4)  | 27(1)    | 27(1)    | 24(1)    | 3(1)     | -9(1)    | -4(1)    |
| Pb(5)  | 36(1)    | 24(1)    | 33(1)    | 6(1)     | -15(1)   | -8(1)    |
| Pb(6)  | 33(1)    | 29(1)    | 28(1)    | 1(1)     | -9(1)    | -8(1)    |

The anisotropic displacement factor exponent takes the form:  $-2\pi^2[h^2a^{*2}U_{11} + \dots + 2hka^*b^*U_{12}]$ .

**Table S10.** Bond lengths [ $\text{\AA}$ ] for  $(\text{Bmpip})_8\text{Pb}_{11}\text{Br}_{30}$  at 293(2) K with estimated standard deviations in parentheses.

| Label         | Distances  | Label          | Distances  |
|---------------|------------|----------------|------------|
| Br-Pb(1)      | 2.976(5)   | Br(11)-Pb(4)   | 2.9894(11) |
| Br-Pb(2)#1    | 3.140(6)   | Br(11)-Pb(6)#2 | 2.9853(11) |
| Br(2)-Pb(1)   | 3.036(8)   | Br(12)-Pb(3)   | 3.0332(12) |
| Br(2)-Pb(2)#1 | 3.149(7)   | Br(12)-Pb(5)   | 3.0870(12) |
| Br(3)-Pb(1)   | 3.0315(12) | Br(13)-Pb(5)   | 2.9953(12) |
| Br(3)-Pb(2)   | 2.8948(13) | Br(13)-Pb(6)   | 2.9316(12) |
| Br(4)-Pb(1)   | 3.0883(12) | Br(14)-Pb(4)#2 | 3.2283(11) |
| Br(4)-Pb(2)   | 2.9224(12) | Br(14)-Pb(5)   | 2.8806(11) |
| Br(5)-Pb(2)   | 2.9370(12) | Br(14)-Pb(6)   | 3.2216(11) |
| Br(5)-Pb(3)   | 3.1080(12) | Br(15)-Pb(5)   | 2.8821(13) |
| Br(6)-Pb(2)   | 3.1492(12) | Br(15)-Pb(6)   | 3.0932(12) |
| Br(6)-Pb(3)   | 2.9250(12) | Br(16)-Pb(6)   | 2.8130(13) |
| Br(7)-Pb(2)   | 3.1811(12) | Pb(1)-Br#1     | 2.976(5)   |
| Br(7)-Pb(3)   | 2.9917(12) | Pb(1)-Br(2)#1  | 3.036(8)   |
| Br(7)-Pb(5)   | 3.1717(11) | Pb(1)-Br(3)#1  | 3.0315(12) |
| Br(8)-Pb(3)   | 3.1217(12) | Pb(1)-Br(4)#1  | 3.0883(12) |
| Br(8)-Pb(4)   | 2.8629(11) | Pb(2)-Br#1     | 3.140(6)   |
| Br(9)-Pb(3)   | 3.1445(11) | Pb(2)-Br(2)#1  | 3.149(7)   |
| Br(9)-Pb(4)   | 3.1460(11) | Pb(4)-Br(14)#2 | 3.2282(11) |
| Br(10)-Pb(4)  | 2.8279(12) | Pb(6)-Br(11)#2 | 2.9853(12) |

Symmetry transformations used to generate equivalent atoms:

(1)  $-x + 2, -y + 1, -z + 1$  (2)  $-x + 1, -y + 2, -z$ .



**Table S11.** Bond angles [°] for (Bmpip)<sub>8</sub>Pb<sub>11</sub>Br<sub>30</sub> at 293(2) K with estimated standard deviations in parentheses.

| Label              | Angles     | Label               | Angles    |
|--------------------|------------|---------------------|-----------|
| Pb(1)-Br-Pb(2)     | 79.30(13)  | Br(3)-Pb(2)-Br(7)   | 95.69(4)  |
| Pb(1)-Br(2)-Pb(2)  | 78.3(2)    | Br(4)-Pb(2)-Br      | 84.6(4)   |
| Pb(2)-Br(3)-Pb(1)  | 82.40(3)   | Br(4)-Pb(2)-Br(2)   | 77.7(3)   |
| Pb(2)-Br(4)-Pb(1)  | 80.98(3)   | Br(4)-Pb(2)-Br(5)   | 95.67(4)  |
| Pb(2)-Br(5)-Pb(3)  | 82.35(3)   | Br(4)-Pb(2)-Br(6)   | 96.36(3)  |
| Pb(3)-Br(6)-Pb(2)  | 81.83(3)   | Br(4)-Pb(2)-Br(7)   | 176.13(4) |
| Pb(3)-Br(7)-Pb(2)  | 80.27(3)   | Br(5)-Pb(2)-Br      | 170.5(5)  |
| Pb(3)-Br(7)-Pb(5)  | 82.53(3)   | Br(5)-Pb(2)-Br(2)   | 173.2(2)  |
| Pb(5)-Br(7)-Pb(2)  | 160.66(4)  | Br(5)-Pb(2)-Br(6)   | 79.20(3)  |
| Pb(4)-Br(8)-Pb(3)  | 87.35(3)   | Br(5)-Pb(2)-Br(7)   | 80.60(3)  |
| Pb(3)-Br(9)-Pb(4)  | 82.25(3)   | Br(6)-Pb(2)-Br(7)   | 81.95(3)  |
| Pb(6)-Br(11)-Pb(4) | 86.65(3)   | Br(5)-Pb(3)-Br(8)   | 110.47(3) |
| Pb(3)-Br(12)-Pb(5) | 83.29(3)   | Br(5)-Pb(3)-Br(9)   | 105.28(3) |
| Pb(6)-Br(13)-Pb(5) | 81.96(3)   | Br(6)-Pb(3)-Br(5)   | 80.06(3)  |
| Pb(5)-Br(14)-Pb(4) | 156.99(4)  | Br(6)-Pb(3)-Br(7)   | 89.09(4)  |
| Pb(5)-Br(14)-Pb(6) | 78.93(3)   | Br(6)-Pb(3)-Br(8)   | 104.20(4) |
| Pb(6)-Br(14)-Pb(4) | 78.93(3)   | Br(6)-Pb(3)-Br(9)   | 171.99(4) |
| Pb(5)-Br(15)-Pb(6) | 81.08(3)   | Br(7)-Pb(3)-Br(5)   | 80.98(3)  |
| Br-Pb(1)-Br        | 180.000(3) | Br(7)-Pb(3)-Br(8)   | 163.57(3) |
| Br-Pb(1)-Br(2)     | 168.7(2)   | Br(7)-Pb(3)-Br(9)   | 85.92(3)  |
| Br-Pb(1)-Br(2)     | 168.7(2)   | Br(7)-Pb(3)-Br(12)  | 86.43(3)  |
| Br-Pb(1)-Br(2)     | 11.3(2)    | Br(8)-Pb(3)-Br(9)   | 79.75(3)  |
| Br-Pb(1)-Br(2)     | 11.3(2)    | Br(12)-Pb(3)-Br(5)  | 166.61(3) |
| Br-Pb(1)-Br(3)     | 99.8(4)    | Br(12)-Pb(3)-Br(8)  | 82.81(3)  |
| Br-Pb(1)-Br(3)     | 80.2(4)    | Br(12)-Pb(3)-Br(9)  | 78.18(3)  |
| Br-Pb(1)-Br(3)     | 80.2(4)    | Br(8)-Pb(4)-Br(9)   | 83.78(3)  |
| Br-Pb(1)-Br(3)     | 99.8(4)    | Br(8)-Pb(4)-Br(11)  | 90.39(3)  |
| Br-Pb(1)-Br(4)     | 95.4(5)    | Br(8)-Pb(4)-Br(14)  | 170.70(3) |
| Br-Pb(1)-Br(4)     | 84.6(5)    | Br(9)-Pb(4)-Br(14)  | 105.52(3) |
| Br-Pb(1)-Br(4)     | 95.4(5)    | Br(10)-Pb(4)-Br(8)  | 93.48(4)  |
| Br-Pb(1)-Br(4)     | 84.6(5)    | Br(10)-Pb(4)-Br(9)  | 91.35(3)  |
| Br(2)-Pb(1)-Br(2)  | 180.000(1) | Br(10)-Pb(4)-Br(11) | 85.95(3)  |
| Br(2)-Pb(1)-Br(4)  | 103.0(3)   | Br(10)-Pb(4)-Br(14) | 86.15(3)  |
| Br(2)-Pb(1)-Br(4)  | 77.0(3)    | Br(11)-Pb(4)-Br(9)  | 173.42(3) |
| Br(2)-Pb(1)-Br(4)  | 77.0(3)    | Br(11)-Pb(4)-Br(14) | 80.31(3)  |
| Br(2)-Pb(1)-Br(4)  | 103.0(3)   | Br(12)-Pb(5)-Br(7)  | 82.46(3)  |
| Br(3)-Pb(1)-Br(2)  | 87.2(3)    | Br(13)-Pb(5)-Br(7)  | 94.85(3)  |
| Br(3)-Pb(1)-Br(2)  | 87.2(3)    | Br(13)-Pb(5)-Br(12) | 177.04(3) |
| Br(3)-Pb(1)-Br(2)  | 92.8(3)    | Br(14)-Pb(5)-Br(7)  | 172.83(4) |

|                   |           |                     |           |
|-------------------|-----------|---------------------|-----------|
| Br(3)-Pb(1)-Br(2) | 92.8(3)   | Br(14)-Pb(5)-Br(12) | 99.55(3)  |
| Br(3)-Pb(1)-Br(3) | 180.0     | Br(14)-Pb(5)-Br(13) | 83.28(3)  |
| Br(3)-Pb(1)-Br(4) | 80.25(3)  | Br(14)-Pb(5)-Br(15) | 85.64(3)  |
| Br(3)-Pb(1)-Br(4) | 80.25(3)  | Br(15)-Pb(5)-Br(7)  | 101.19(4) |
| Br(3)-Pb(1)-Br(4) | 99.75(3)  | Br(15)-Pb(5)-Br(12) | 92.48(4)  |
| Br(3)-Pb(1)-Br(4) | 99.75(3)  | Br(15)-Pb(5)-Br(13) | 86.82(4)  |
| Br(4)-Pb(1)-Br(4) | 180.0     | Br(11)-Pb(6)-Br(14) | 80.48(3)  |
| Br-Pb(2)-Br(2)    | 10.83(18) | Br(11)-Pb(6)-Br(15) | 155.67(4) |
| Br-Pb(2)-Br(6)    | 110.3(4)  | Br(13)-Pb(6)-Br(11) | 99.41(3)  |
| Br-Pb(2)-Br(7)    | 99.3(4)   | Br(13)-Pb(6)-Br(14) | 78.63(3)  |
| Br(2)-Pb(2)-Br(6) | 102.5(3)  | Br(13)-Pb(6)-Br(15) | 84.17(4)  |
| Br(2)-Pb(2)-Br(7) | 106.1(3)  | Br(15)-Pb(6)-Br(14) | 76.64(3)  |
| Br(3)-Pb(2)-Br    | 79.7(4)   | Br(16)-Pb(6)-Br(11) | 95.95(4)  |
| Br(3)-Pb(2)-Br(2) | 87.5(3)   | Br(16)-Pb(6)-Br(13) | 89.51(4)  |
| Br(3)-Pb(2)-Br(4) | 85.38(4)  | Br(16)-Pb(6)-Br(14) | 166.80(4) |
| Br(3)-Pb(2)-Br(5) | 90.84(4)  | Br(16)-Pb(6)-Br(15) | 108.18(4) |
| Br(3)-Pb(2)-Br(6) | 170.01(4) |                     |           |

Symmetry transformations used to generate equivalent atoms:

(1)  $-x + 2, -y + 1, -z + 1$  (2)  $-x + 1, -y + 2, -z$ .

**Table S12.** Bond length and bond angle average and distortion of individual [PbBr<sub>6</sub>] octahedra of (Bmpip)<sub>8</sub>Pb<sub>11</sub>Br<sub>30</sub> ( $\theta_m$  is the mean value of Br-Pb-Br angles).

| Label                      | Pb1    | Pb2    | Pb3    | Pb4    | Pb5    | Pb6    | Average |
|----------------------------|--------|--------|--------|--------|--------|--------|---------|
| $d_m$ (Å)                  | 3.042  | 3.038  | 3.054  | 3.060  | 3.072  | 3.043  | 3.0515  |
| $\theta_m$ (°)             | 90.000 | 89.955 | 89.870 | 90.150 | 89.313 | 90.076 | 89.894  |
| $\Delta d(\times 10^{-4})$ | 1.3    | 16.0   | 6.5    | 34.3   | 38.1   | 20.3   | 19.4    |
| $\sigma^2$                 | 80.0   | 86.0   | 126.3  | 105.0  | 163.0  | 79.8   | 106.7   |

**Table S13.** Main parameters of crystal and refinement power of (Bmpip)<sub>2</sub>ZnBr<sub>4</sub>.

| Status                | Crystal | Power   |
|-----------------------|---------|---------|
| $a$ (Å)               | 16.3329 | 16.5138 |
| $b$ (Å)               | 10.5189 | 10.7468 |
| $c$ (Å)               | 16.9147 | 16.9680 |
| $\beta$ (°)           | 111.10  | 110.102 |
| $V$ (Å <sup>3</sup> ) | 2711.1  | 2827.87 |
| $R_p$ (%)             |         | 13.6    |
| $R_{wp}$ (%)          |         | 15.7    |
| $R_{exp}$ (%)         |         | 7.86    |
| $\chi^2$              |         | 3.98    |

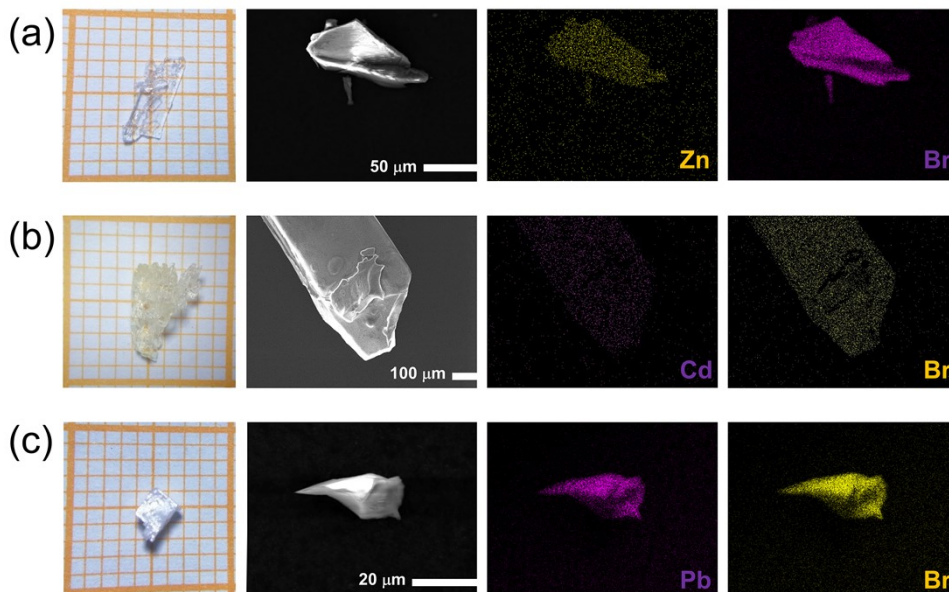

**Fig. S1** Optical and SEM images and EDS mapping diagrams of  $(\text{Bmpip})_2\text{ZnBr}_4$  (a),  $(\text{Bmpip})_2\text{CdBr}_4$  (b) and  $(\text{Bmpip})_8\text{Pb}_{11}\text{Br}_{30}$  (c).

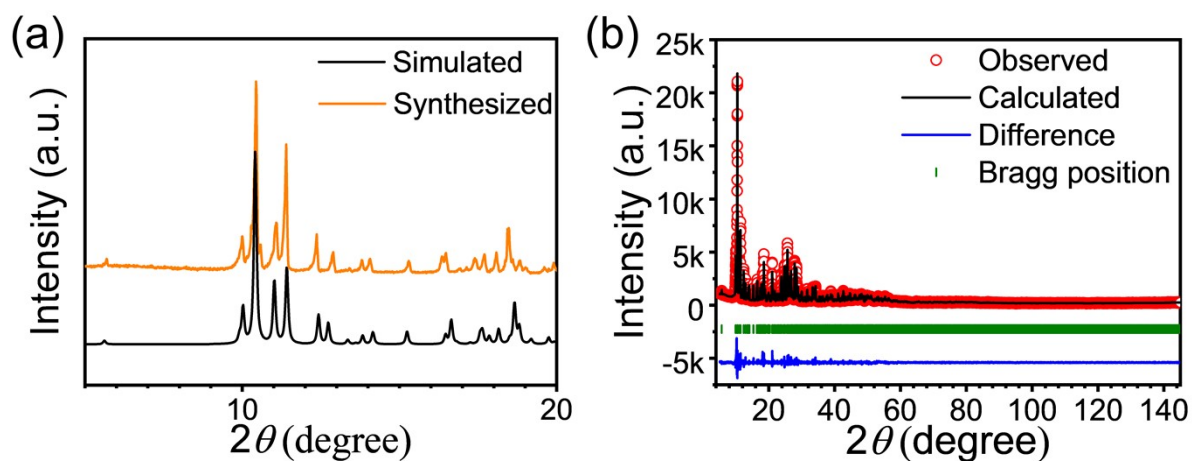

**Fig. S2** (a) Local details of simulated and experimental PXR patterns. (b) Rietveld refinement of  $(\text{Bmpip})_2\text{ZnBr}_4$ .

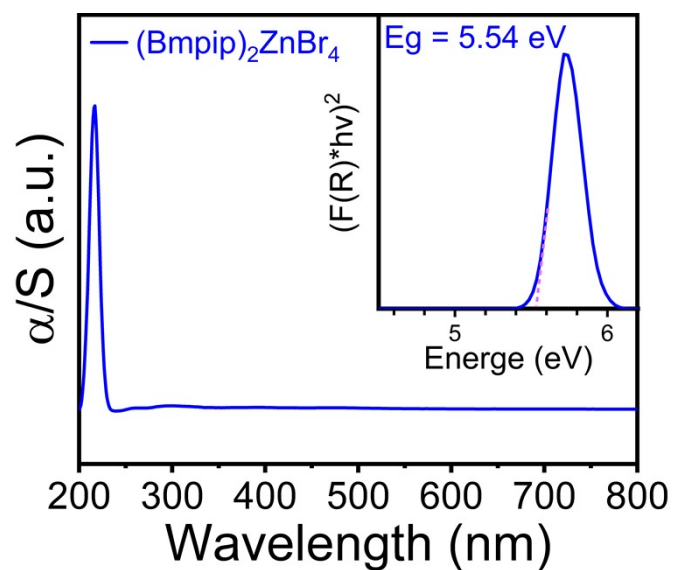

**Fig. S3** Absorption spectra and the band gap obtained from Tauc plots (inset) of  $(\text{Bmpip})_2\text{ZnBr}_4$ .

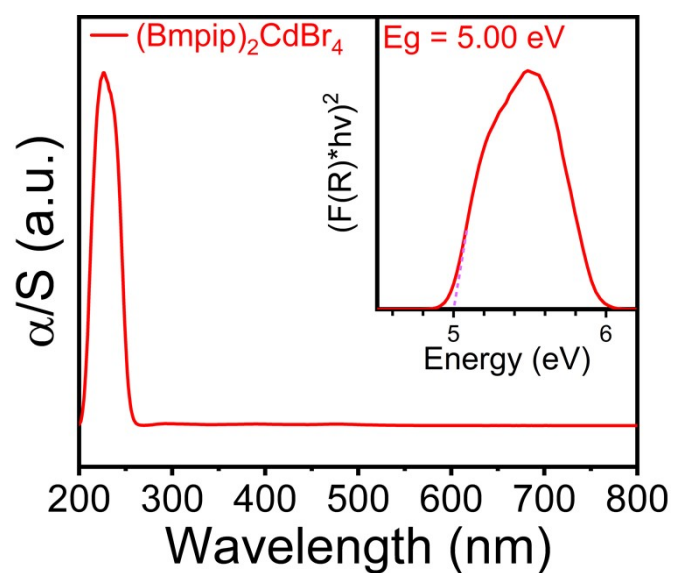

**Fig. S4** Absorption spectra and the band gap obtained from Tauc plots (inset) of  $(\text{Bmpip})_2\text{CdBr}_4$ .

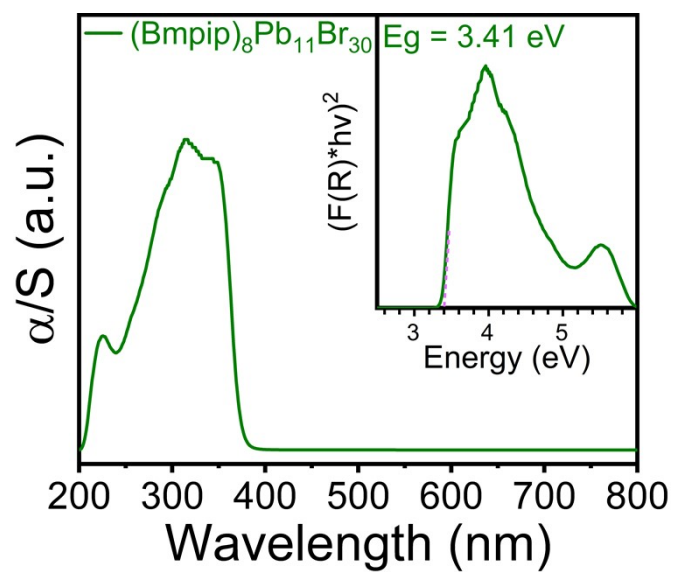

**Fig. S5** Absorption spectra and the band gap obtained from Tauc plots (inset) of  $(\text{Bmpip})_8\text{Pb}_{11}\text{Br}_{30}$ .

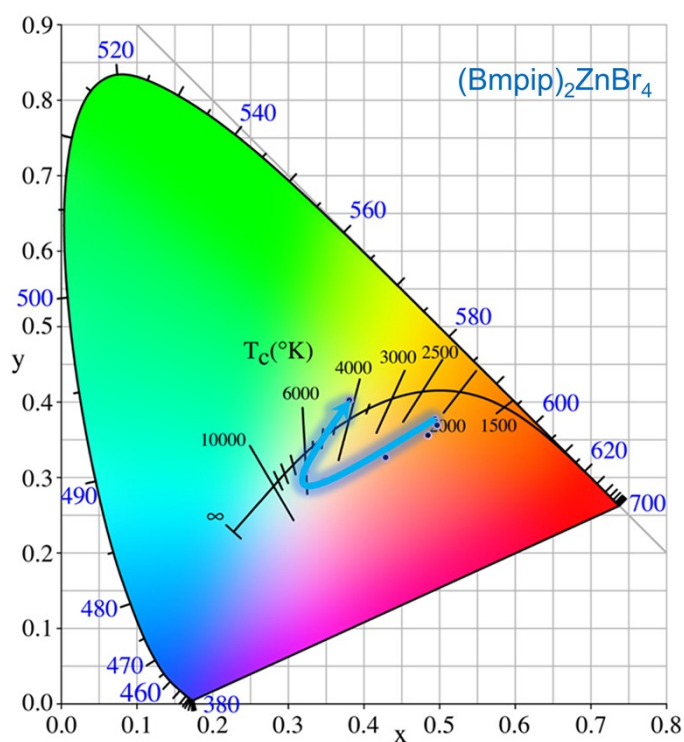

**Fig. S6** CIE coordinates change with temperature increasing of  $(\text{Bmpip})_2\text{ZnBr}_4$ .

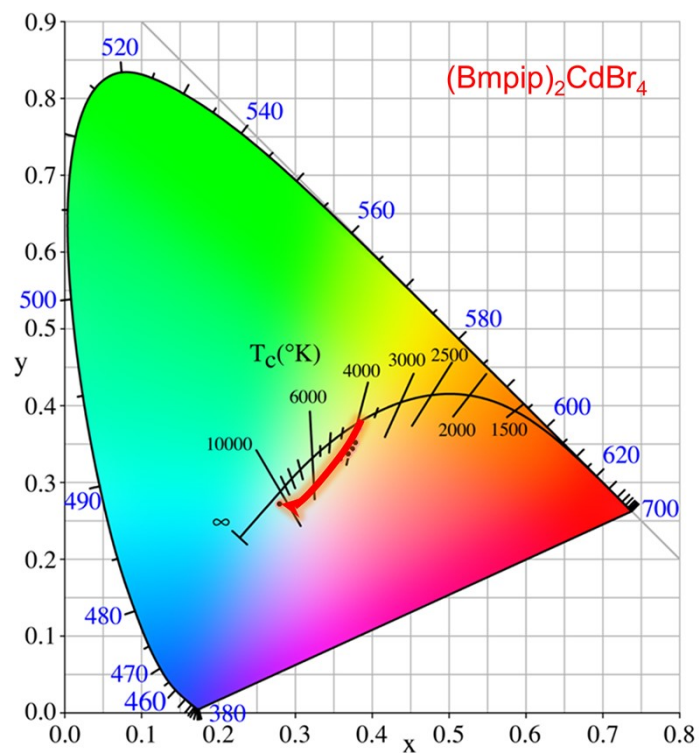

**Fig. S7** CIE coordinates change with temperature increasing of  $(\text{Bmpip})_2\text{CdBr}_4$ .

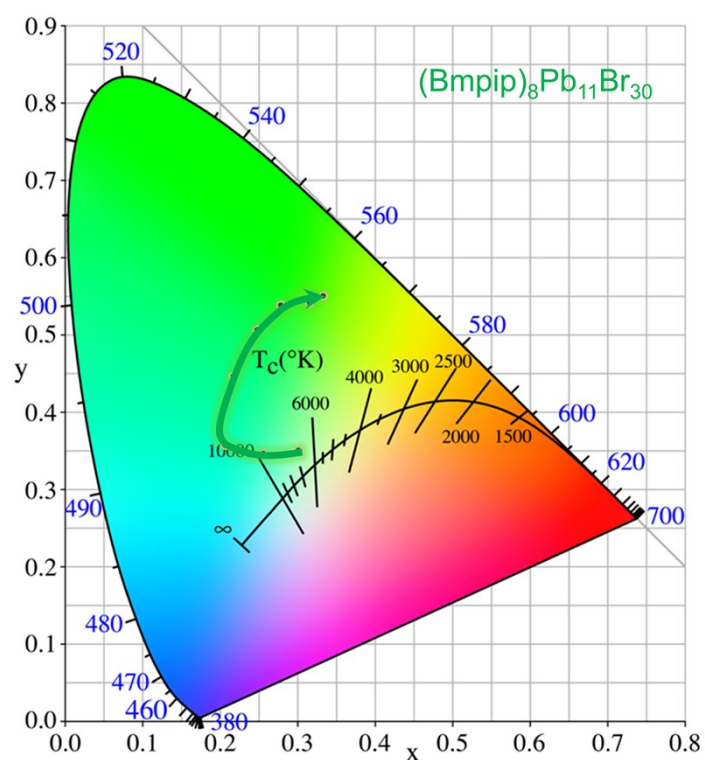

**Fig. S8** CIE coordinates change with temperature increasing of  $(\text{Bmpip})_8\text{Pb}_{11}\text{Br}_{30}$ .
